# Supplementary material
Source: PubMed Central journal article supplement (PMC4659783)
Supplement: 12263_2015_508_MOESM6_ESM.pdf [file 12263_2015_508_MOESM6_ESM.pdf]

## Caloric Restriction

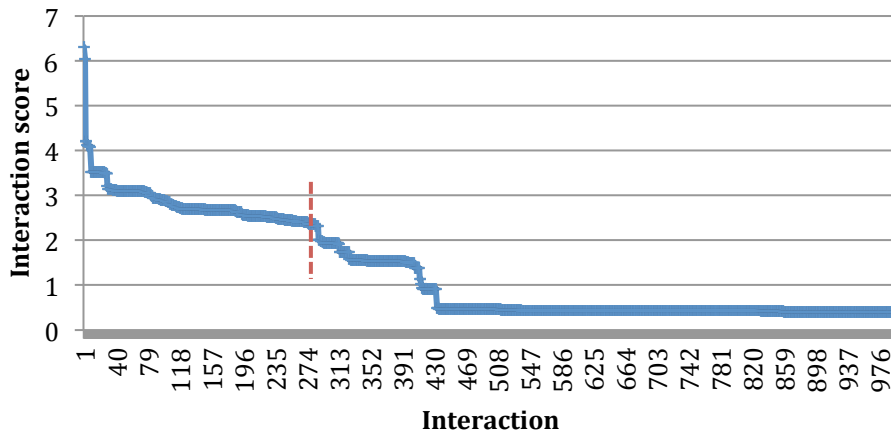

## Resveratrol

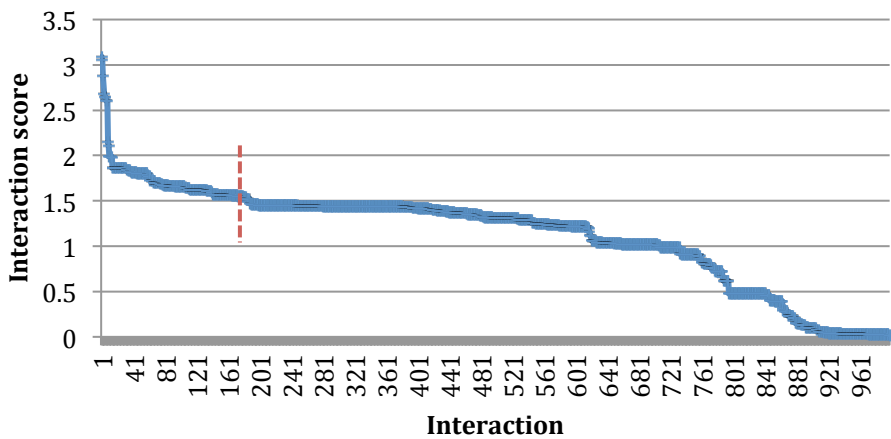

## Age

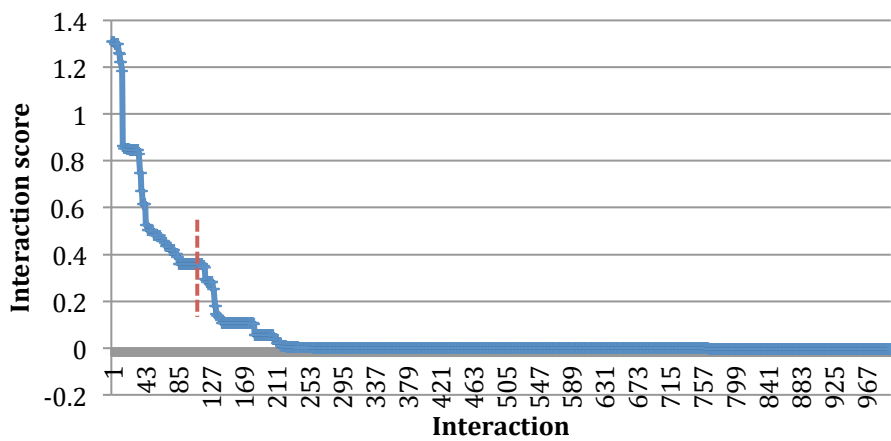

## Figure legend

**Supplementary Figure 1.** The plots of the sorted interaction scores (i.e. value of Edge Flux) computed by NetWalker for Caloric restriction, Resveratrol and age. The red lines show the location of the selected threshold values found in Supplementary Table 2.
